# Supplementary material for: Reduction of charge recombination in PbS colloidal quantum dot solar cells at the quantum dot/ZnO interface by inserting a MgZnO buffer layer
Source: Royal Society of Chemistry journal article supplement (doi:10.1039/c6ta07775g), 2016-11-18
Supplement: c6ta07775g1.pdf [file c6ta07775g1.pdf]

Supporting Information

**Reduction of Charge Recombination in PbS Colloidal Quantum Dot Solar Cells at the Quantum Dot/ZnO Interface by Inserting a MgZnO Buffer Layer**

*Xiaoliang Zhang, and Erik M. J. Johansson\**

Department of Chemistry-Ångström, Physical Chemistry, Uppsala University, 75120 Uppsala, Sweden.

\*E-mail: erik.johansson@kemi.uu.se

**Content:**

**Figure S1.** CBM and VBM as function of molar ratio of Mg in MZO film.

**Figure S2.** Cross-sectional SEM image of ZnO/MZO electrode covered FTO glass.

**Figure S3.** Light absorption and normalized photoluminescence spectra of PbS CQDs in octane.

**Figure S4.** Band diagram within the CQD solar cell with a BL at maximum power point. The CBM up-shift 0.1 eV referring to ZnO layer

**Figure S5.** *J-V* curve of the solar cell with a MZO-BL as a function of molar ratio of magnesium in MZO layer.

**Figure S6.** *J-V* curve of the solar cell with a MZO film as electron collecting layer.

**Figure S7.** The stability test of CQD solar cell with a MZO-BL and without any BLs. The unsealed solar cells were stored in ambient atmosphere under dark condition.

**Figure S8.** *J-V* curves of the solar cell without any BLs and with a MZO-BL under dark and illumination condition.

**Figure S9.** Model figure from SCAPS simulation.

**Table S1.** Details of SCAPS simulation used parameters.

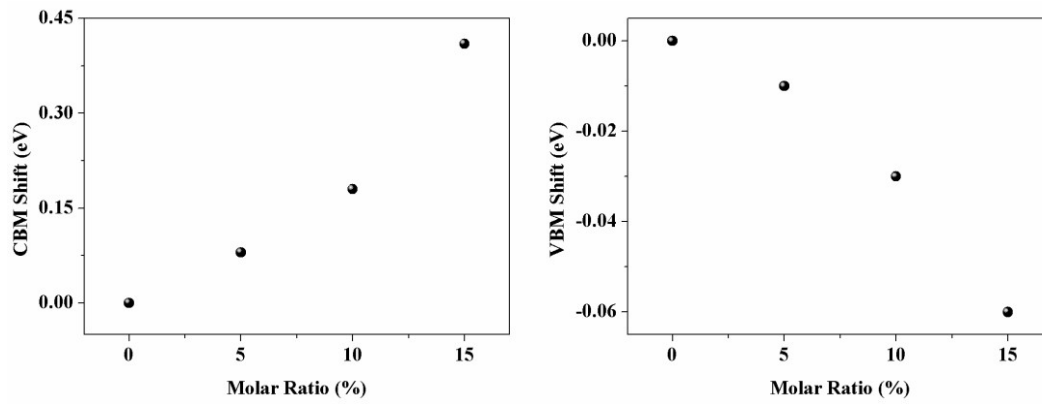

**Figure S1.** CBM and VBM as function of molar ratio of Mg in MZO film. Values obtained from reference.<sup>1</sup>

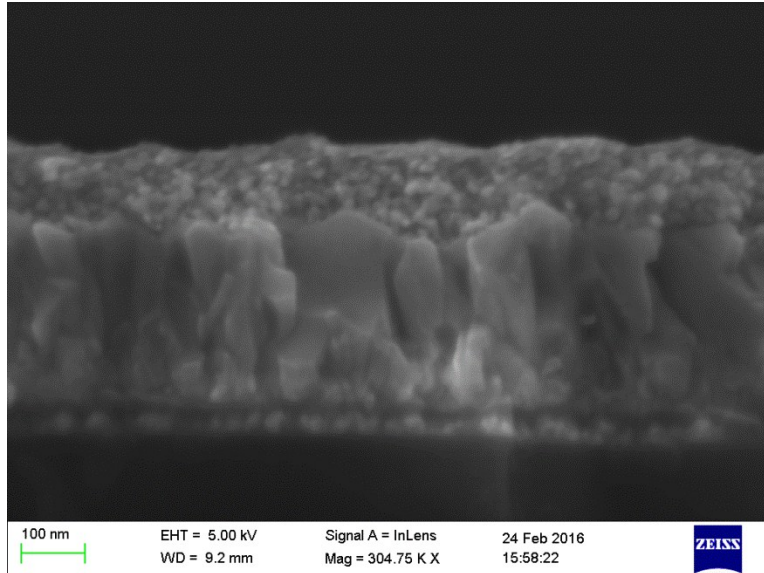

**Figure S2.** Cross-sectional SEM image of ZnO/MZO electrode covered FTO glass.

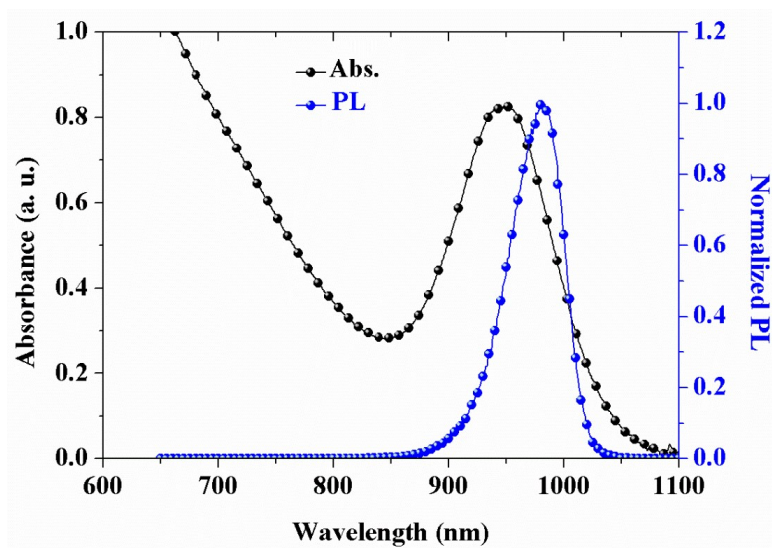

**Figure S3.** Light absorption and normalized photoluminescence spectra of PbS CQDs in octane.

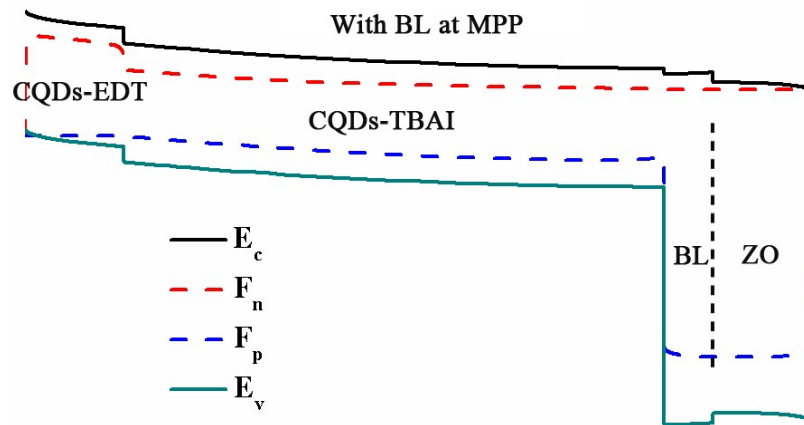

**Figure S4.** Band diagram within the CQD solar cell with a BL at maximum power point. The CBM up-shift 0.1 eV referring to ZnO layer

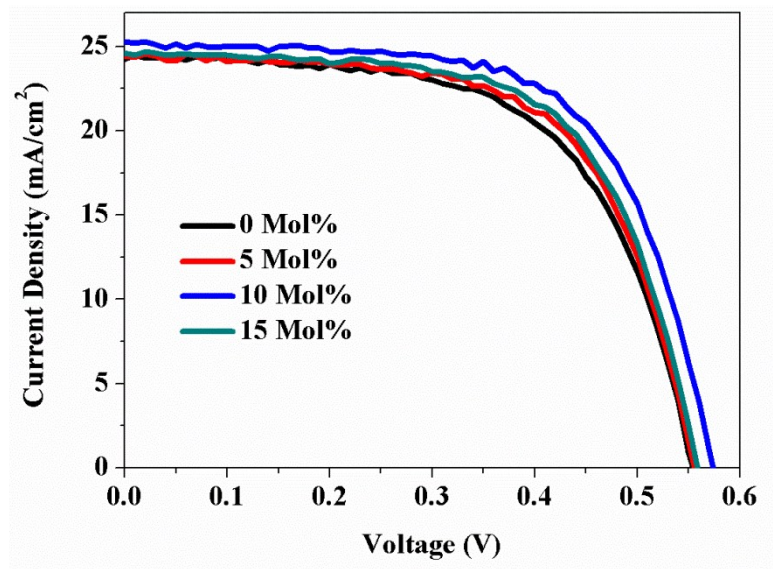

**Figure S5.**  $J$ - $V$  curves of the solar cells with a MZO-BL as a function of molar ratio of magnesium in MZO layer.

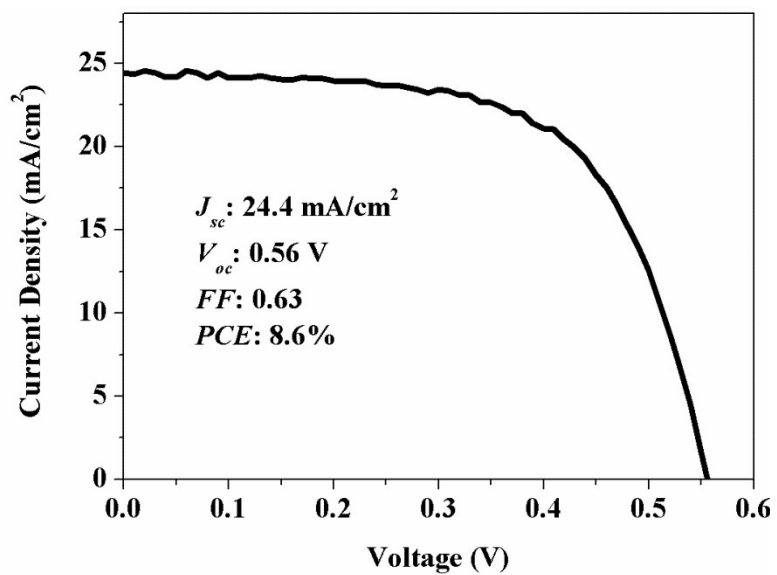

**Figure S6.** *J-V* curve of the solar cell with a MZO film as electron collecting layer.

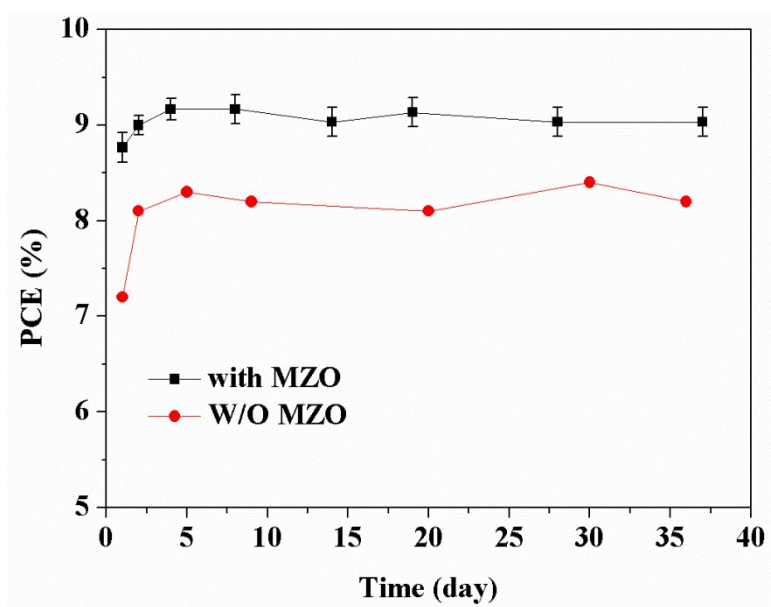

**Figure S7.** The stability test of CQD solar cell with a MZO-BL and without any BLs (ZnO only). The unsealed solar cells were stored in ambient atmosphere under dark condition.



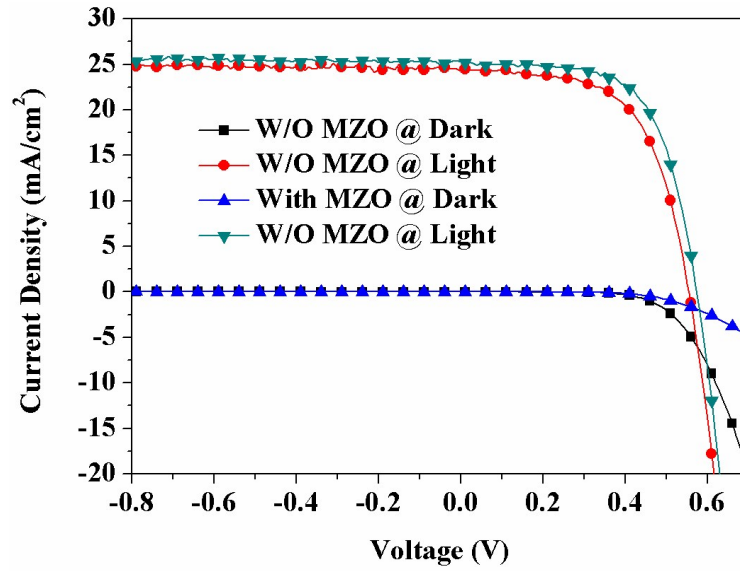

**Figure S8.**  $J$ - $V$  curves of the solar cell without any BLs and with a MZO-BL under dark and illumination condition.

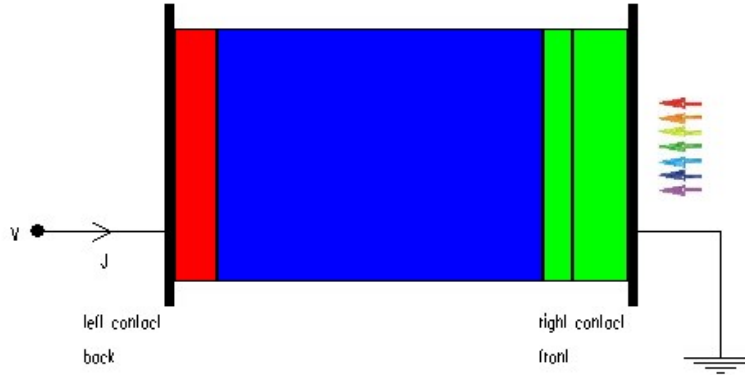

**Figure S9.** Model figure from SCAPS simulation.

**Table S1.** Details of SCAPS simulation used parameters. Part of these parameters are taken from literatures.<sup>2,3</sup>

|                                               | PbS-TBAI                                                                      | PbS-EDT | ZnO(or MZO)      |
|-----------------------------------------------|-------------------------------------------------------------------------------|---------|------------------|
| Thickness (nm)                                | 230                                                                           | 50      | 60 (40+20)       |
| Bandgap edge (eV)                             | 1.2                                                                           | 1.2     | 3.2(or up shift) |
| Electron affinity (eV)                        | 4.15                                                                          | 3.9     | 4.3              |
| Permittivity ( $\epsilon_r$ )                 | 20                                                                            | 20      | 66               |
| CB/VB DOS ( $\text{cm}^{-3}$ )                | 1E19                                                                          | 1E19    | 1E19             |
| Electron mobility ( $\text{cm}^2/\text{Vs}$ ) | 2E-2                                                                          | 2E-4    | 5E-2             |
| Ndonor ( $\text{cm}^{-3}$ )                   | 1E15                                                                          | 1E14    | 1E17             |
| Nacceptor ( $\text{cm}^{-3}$ )                | 1E15                                                                          | 1E16    | 0                |
| EDT/TBAI defect (neutral)                     | total density (integrated over all energies) ( $1/\text{cm}^2$ ):<br>1.00E+16 |         |                  |
| Capture cross section ( $\text{cm}^2$ )       | 1.2E-13                                                                       | 1.2E-13 |                  |
| Position below $E_c$ (eV)                     | 0.5                                                                           | 0.5     |                  |
| Density ( $\text{cm}^{-3}$ )                  | 1E16                                                                          | 1E16    |                  |
| TBAI-ZnO interface defects (neutral)          | total density (integrated over all energies) ( $1/\text{cm}^2$ ):<br>1.00E+16 |         |                  |
| Capture cross section ( $\text{cm}^2$ )       |                                                                               |         | 1E-19            |
| Position above $E_v$ (eV)                     |                                                                               |         | 0.6              |
| Density ( $\text{cm}^{-3}$ )                  |                                                                               |         | 1E16             |

## References

1. L. Hu, D. B. Li, L. Gao, H. Tan, C. Chen, K. H. Li, M. Li, J. B. Han, H. S. Song, H. Liu, and J. Tang, *Adv. Funct. Mater.* **2016**, *26*, 1899-1907.
2. G. H. Kim, F. P. Garcia de Arquer, Y. J. Yoon, X. Lan, M. Liu, O. Voznyy, Z. Yang, F. Fan, A. H. Ip, P. Kanjanaboos, S. Hoogland, J. Y. Kim, and E. H. Sargent, *Nano Lett.* **2015**, *15*, 7691-7696.
3. M. Liu, F. P. de Arquer, Y. Li, X. Lan, G. H. Kim, O. Voznyy, L. K. Jagadamma, A. S. Abbas, S. Hoogland, Z. Lu, J. Y. Kim, A. Amassian, and E. H. Sargent, *Adv. Mater.* **2016**, *28*, 4142-4148.
